# Supplementary material for: Co(OH)2/RGO/NiO sandwich-structured nanotube arrays with special surface and synergistic effects as high-performance positive electrodes for asymmetric supercapacitors
Source: Royal Society of Chemistry journal article supplement (doi:10.1039/c5nr04449a), 2015-01-01
Supplement: c5nr04449a1.pdf [file c5nr04449a1.pdf]

---

## Supporting Information

### Template-Assisted Synthesis of $\text{Co}(\text{OH})_2/\text{RGO}/\text{NiO}$ Sandwich-Structured Nanotube Arrays for Supercapacitor Application

Han Xu, Chi Zhang, Wen Zhou, and Gao-Ren Li\*

*MOE Laboratory of Bioinorganic and Synthetic Chemistry, KLGHEI of Environment and Energy Chemistry, School of Chemistry and Chemical Engineering, Sun Yat-sen University, Guangzhou 510275, China*

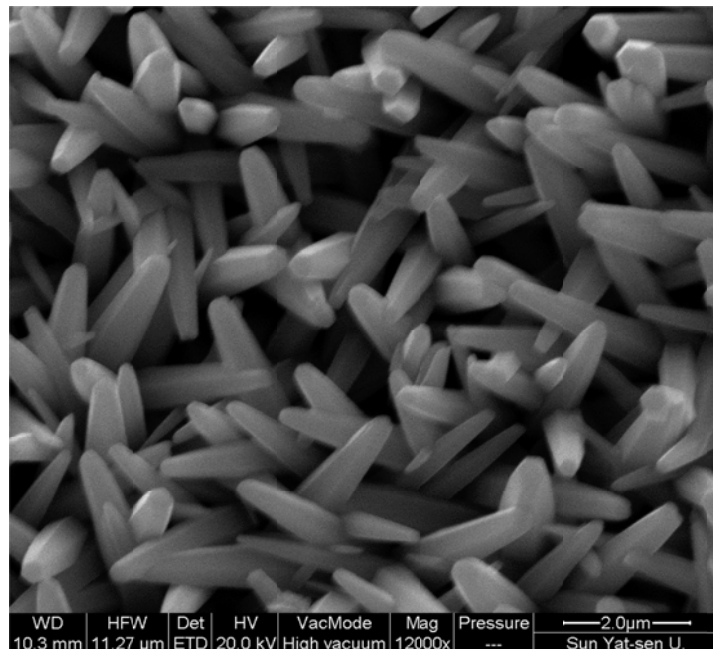

**Figure S1.** SEM image of ZnO NRAs.

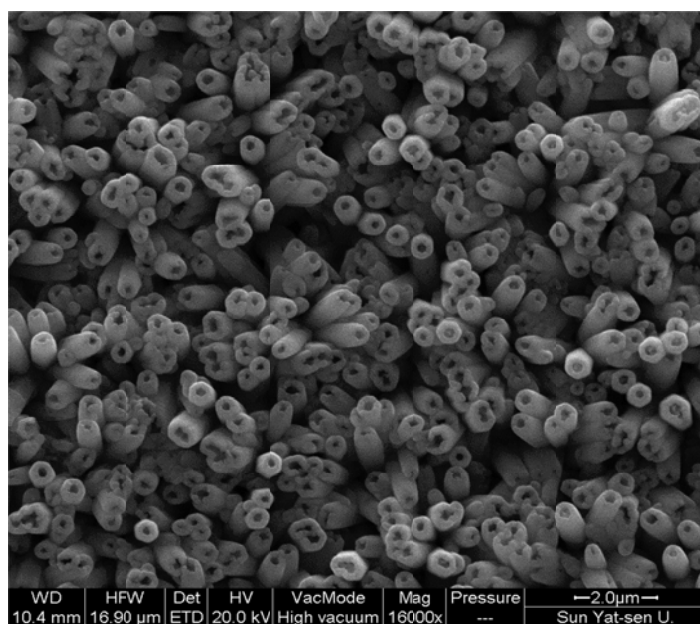

**Figure S2.** SEM image of MnO<sub>2</sub> NTAs.

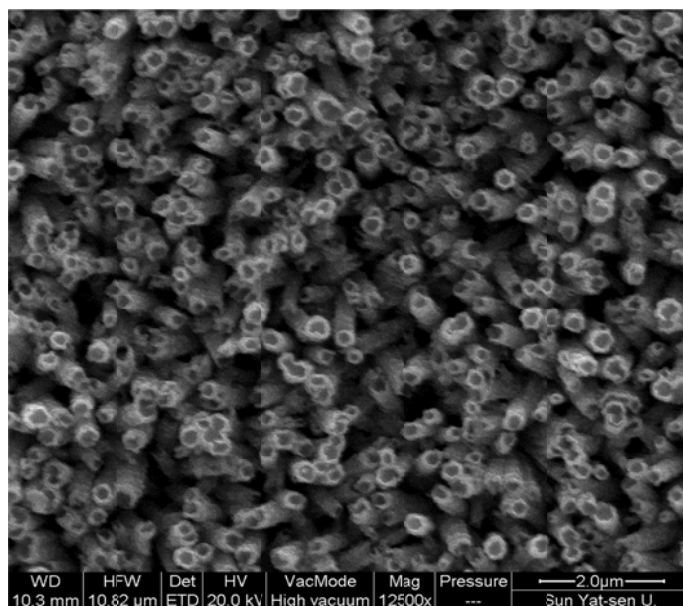

**Figure S3.** SEM image of Co(OH)<sub>2</sub> NTAs.

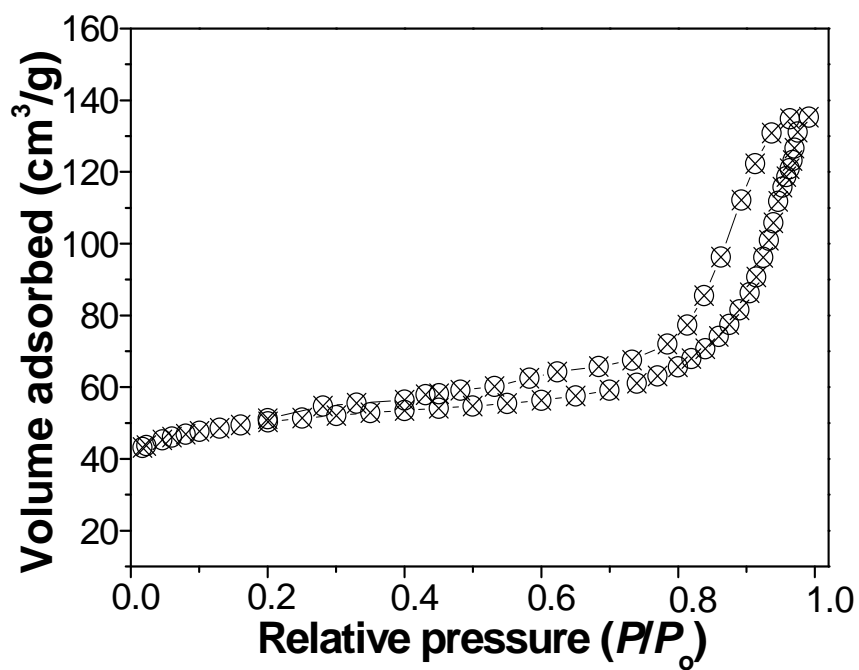

**Figure S4.** N<sub>2</sub> adsorption-desorption isotherms of Co(OH)<sub>2</sub>/RGO/NiO SNTAs.

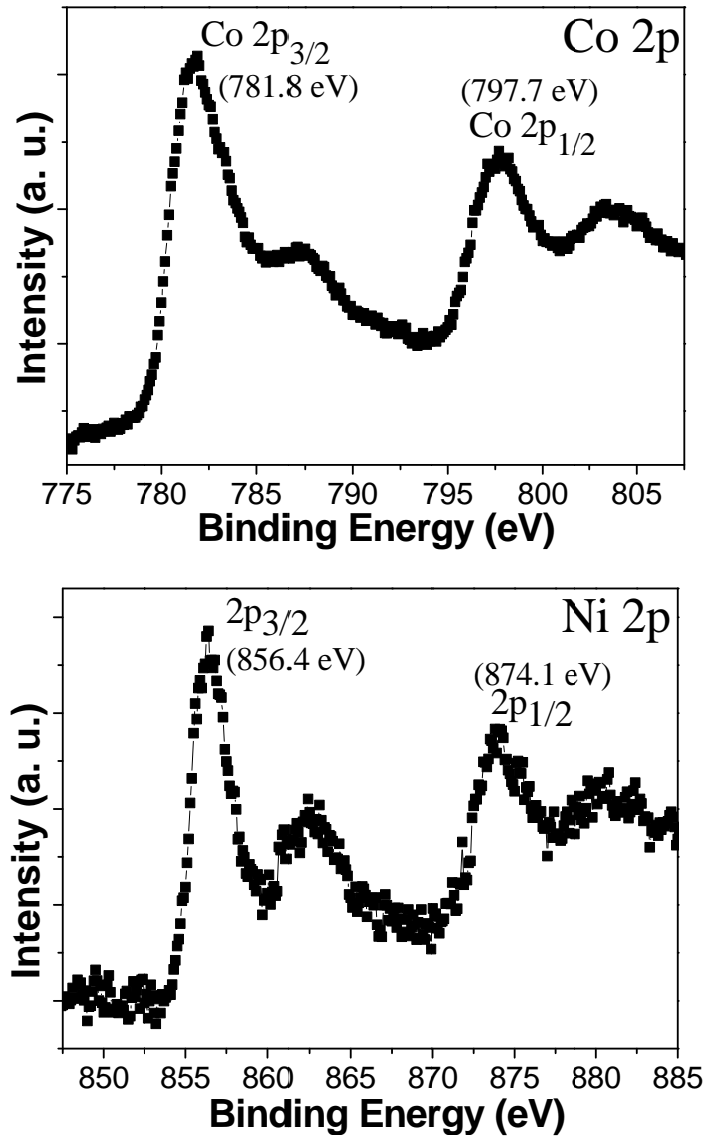

**Figure S5.** XPS spectra of (a) Co 2p performed on Co(OH)<sub>2</sub> NTAs and (b) Ni 2p performed on NiO NTAs.

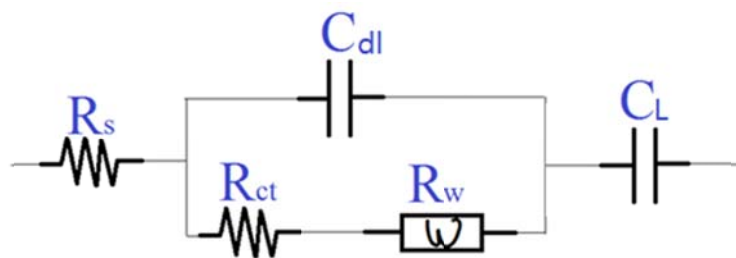

**Figure S6.** The equivalent circuit of the measured Nyquist plots of Co(OH)<sub>2</sub>/RGO/NiO SNTAs.

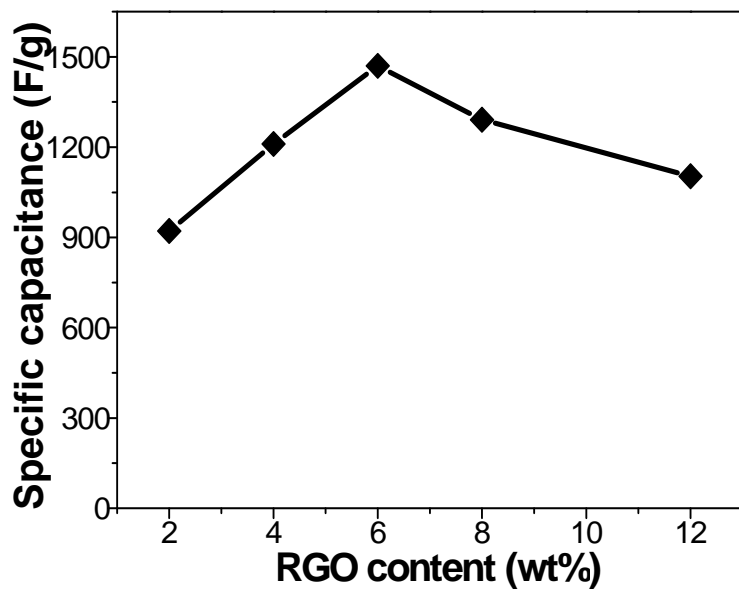

**Figure S7.** The dependence of specific capacitance on RGO content in the  $\text{Co(OH)}_2/\text{RGO}/\text{NiO}$  SNTAs.

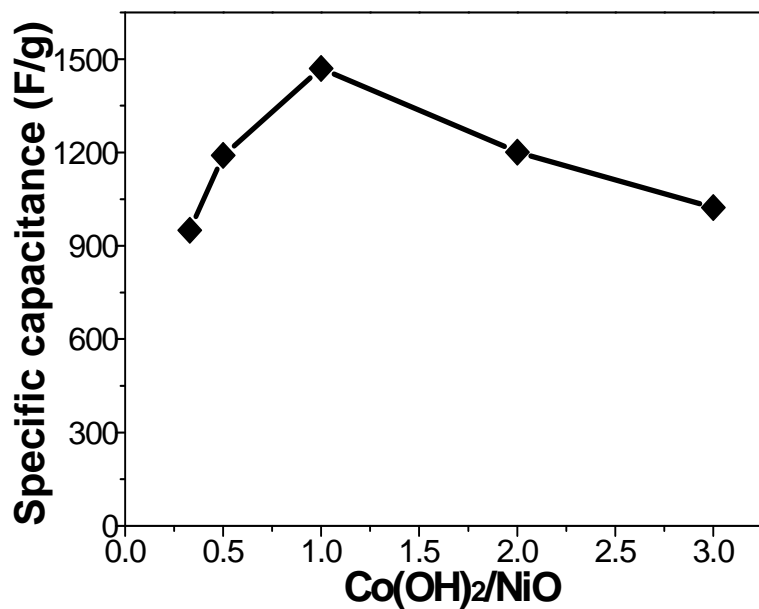

**Figure S8.** The dependence of specific capacitance on  $\text{Co(OH)}_2/\text{NiO}$  ratio in the  $\text{Co(OH)}_2/\text{RGO}/\text{NiO}$  SNTAs.

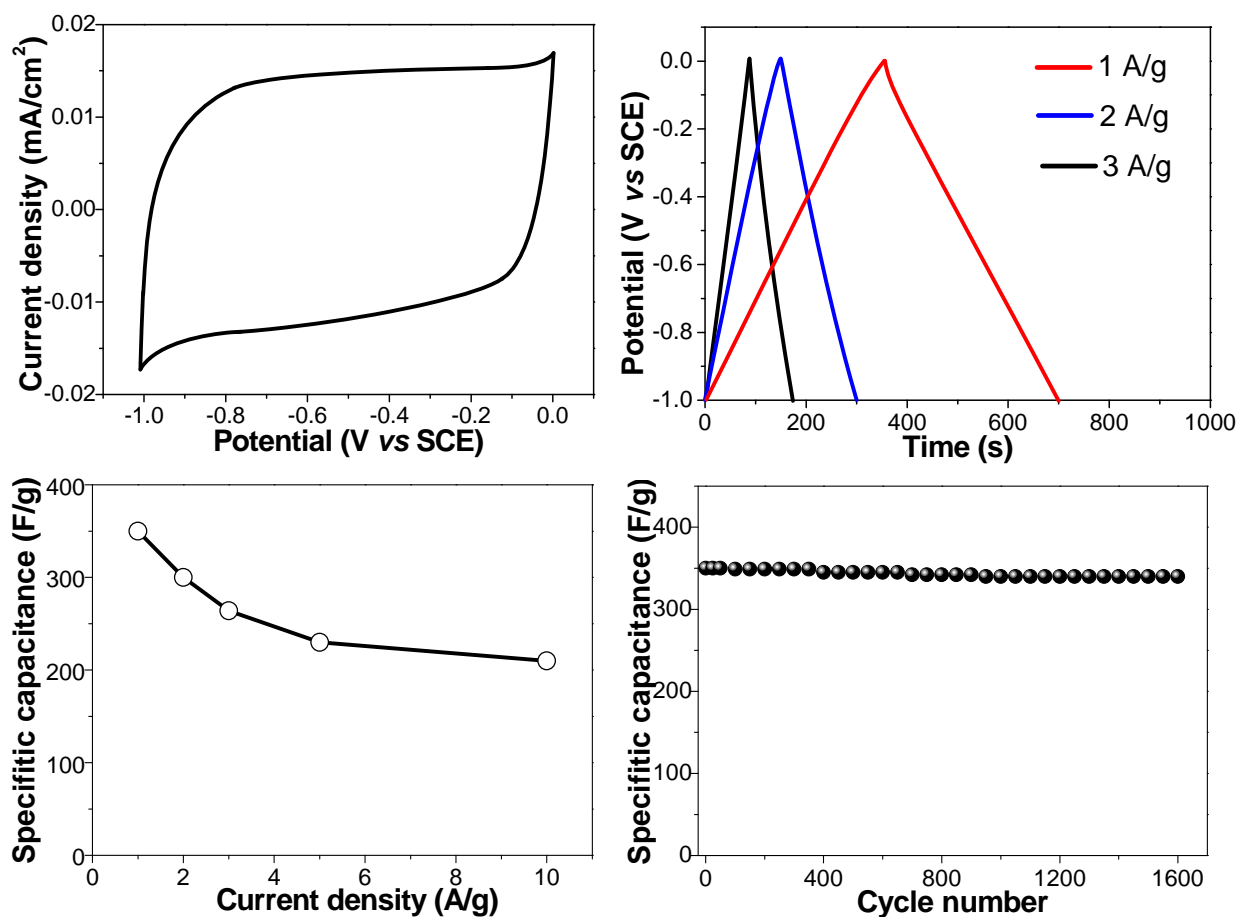

**Figure S9.** (a) CV curve at 100 mV/s; (b) Galvanostatic charge/discharge curves at different current densities; (c) The dependence of specific capacitance on current density; (d) Cycle performance of AC in 1.0 M KOH solution.

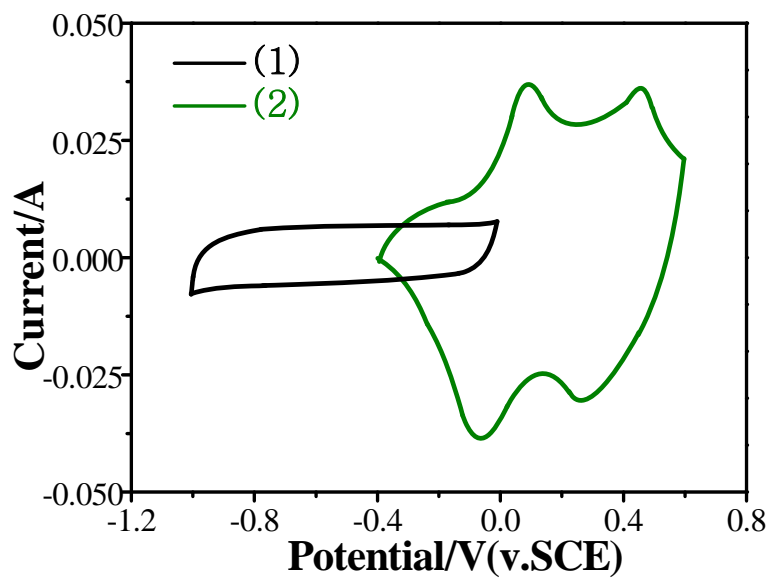

**Figure S10.** CV curves of AC (black curve) and Co(OH)<sub>2</sub>/RGO/NiO SNTAs (green curve) in 1.0 M KOH solution.

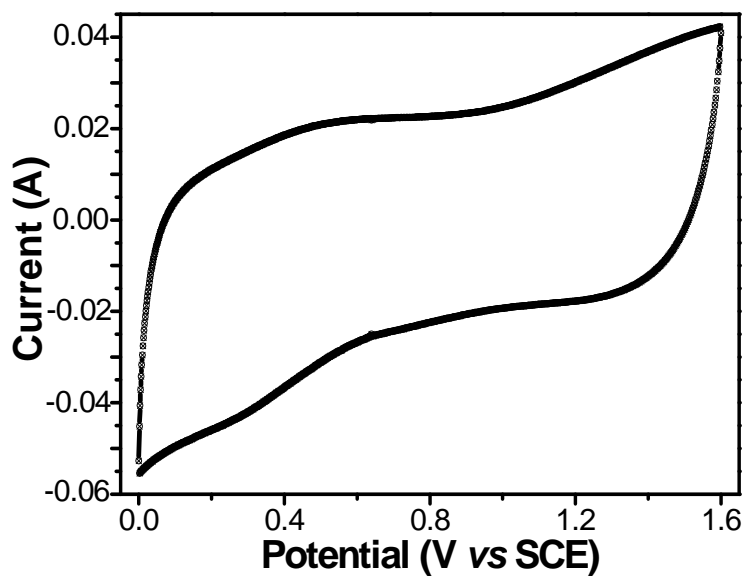

**Figure S11.** CV of Co(OH)<sub>2</sub>/RGO/NiO SNTAs//AC ASCs measured at 100 mV/s.
